# Supplementary material for: In planta expression of nanobody-based designer chicken antibodies targeting Campylobacter
Source: PubMed Central journal article supplement (PMC6160005; doi:10.1371/journal.pone.0204222), 2018-09-27
Supplement: pone.0204222.s001.pdf [file pone.0204222.s001.pdf]

### **S1 File: Purification of flagellin of the *C. jejuni* strain KC40 flagella**

Motile *C. jejuni* produce a flagellum at one or both poles of the cell. The filament of this flagellum is composed of two flagellins, the major flagellin FlaA and the minor flagellin FlaB (Nuijten *et al.*, 1990). The genes encoding FlaA and FlaB are located next to each other (Guerry, 1997). We purified the flagellins FlaA and FlaB of the *C. jejuni* strain KC40 and used these to isolate anti-flagellin nanobodies from an alpaca immunized with heat-inactivated *C. jejuni* KC40 cells (Vanmarsenille *et al.*, 2017).

### **Purification of the FlaA and FlaB flagellins from *C. jejuni* strain KC40**

The *C. jejuni* strain KC40 was grown on 30 9-cm Petri dishes containing Nutrient Broth No.2 agar medium for 48 hours at 42°C under microaerobic conditions (Oxoid CampyGen, Thermo Fisher Scientific). The cells were recovered from the medium by washing with 3 ml sterile H<sub>2</sub>O. The flagella were detached in a Warring Model 7011 blender set at the highest speed for two intervals of 30 seconds. The blended suspension was centrifuged at 10000 g for 1 hour at 4°C. The supernatant was saved and the pellet was washed with 30 ml of H<sub>2</sub>O. After centrifugation at 10000 g for 1 hour at 4°C, the supernatant was pooled with the first supernatant. The pooled supernatants were centrifuged at 100000 g for 1 hour at 4°C. The pellet containing the flagella was resuspended in 10 ml of H<sub>2</sub>O. The previous low- and high-speed centrifugation steps were repeated once. After resuspending the flagella in 10 ml of H<sub>2</sub>O, the pH of the suspension was lowered with HCl till 2 and the suspension was incubated on ice for 15 minutes. This solution was centrifuged at 100000 g for 1 hour at 0°C. The pH of the supernatant was then adjusted to 8 with NaOH and the supernatant was incubated for 30 minutes on ice. The protein concentration was determined using a BCA assay (Pierce BCA Protein Assay Kit, Thermo Scientific). The supernatant was aliquoted and kept at -20°C. Samples of the supernatant were analysed by SDS-PAGE and by sequencing using liquid chromatography–tandem mass spectrometry (LC–MS/MS) after trypsin digest. The peptides identified by LC–MS/MS are indicated on the aligned amino acid sequences of FlaA and FlaB (Figure A in S1File).

This analysis showed that the purified flagellin is a mixture of FlaA and FlaB subunits.

|      |     |                                                                |  |                                  |  |                  |
|------|-----|----------------------------------------------------------------|--|----------------------------------|--|------------------|
|      |     |                                                                |  |                                  |  | SQANT            |
|      |     |                                                                |  |                                  |  | SQANT            |
|      |     | <b>INTNVAALNAK</b>                                             |  | <b>INSAADDASGMAIADSLR</b>        |  |                  |
| FlaA | 1   | MGFRINTNVAALNAKANSDLNAKSLDSSLARLSSGLRINSAADDASGMAIADSLRSQANT   |  |                                  |  |                  |
|      |     |                                                                |  |                                  |  |                  |
| FlaB | 1   | MGFRINTNIGALNAHANSVVNANELDKLSLRLSSGLRINSAADDASGMAIADSLRSQANT   |  | <b>INSAADDASGMAIADSLR</b>        |  |                  |
|      |     |                                                                |  |                                  |  | SQAAT            |
|      |     |                                                                |  |                                  |  | SQAAT            |
|      |     | <b>LGQAINSGNDALGILQTADKAMDEQLK</b>                             |  |                                  |  |                  |
|      |     | <b>LGQAINSGNDALGILQTADK</b>                                    |  | <b>QDGQSLK</b>                   |  | <b>LM</b>        |
| FlaA | 61  | LGQAINSGNDALGILQTADKAMDEQLKILDTIKTKATQAAQDGQSLKTRTMLQADINKLM   |  |                                  |  |                  |
|      |     |                                                                |  |                                  |  |                  |
| FlaB | 61  | LGQAINNGNDALGILQTADKAMDEQLKILDTIKTKATQAAQDGQSLKTRTMLQADINRLM   |  |                                  |  |                  |
|      |     | <b>LGQAINNGNDALGILQTADK</b>                                    |  | <b>QDGQSLK</b>                   |  | <b>TMLQADINR</b> |
|      |     | <b>LGQAINNGNDALGILQTADKAMDEQLK</b>                             |  |                                  |  |                  |
|      |     | <b>EELDNIAINTTSFNGK</b>                                        |  |                                  |  |                  |
| FlaA | 121 | EELDNIAINTTSFNGKQLLSGGFTNQEFQIGSSSNQTVKATIGATQSSKIGVTRFETGSQS  |  |                                  |  |                  |
|      |     |                                                                |  |                                  |  |                  |
| FlaB | 121 | EELDNIAINTTAFNGKQLLSGNFTNQEFQIGSSSNQTIKASIGPTQSSKIGVTRFETGSQS  |  |                                  |  |                  |
|      |     |                                                                |  |                                  |  |                  |
| FlaA | 181 | VSSGVVGLTIKKNYNGIEDFKFDNVVISTSVGTGLGALAE EINRNADKTGVRATYDVKTG  |  |                                  |  |                  |
|      |     |                                                                |  |                                  |  |                  |
| FlaB | 181 | FTSGVVGLTIKKNYNGLEDKFDNSVISTSVGTGLGALAE INKSSDKTGVRATYDVRTTG   |  |                                  |  |                  |
|      |     |                                                                |  |                                  |  |                  |
| FlaA | 241 | AYAIKEGTTSDFAINGVVGKVDYKDGNGSLISAINAVKDTTGVQASKDESGKLVLT       |  |                                  |  |                  |
|      |     |                                                                |  |                                  |  |                  |
| FlaB | 241 | VYAIKEGTTSDFAINGVVGQINVKDGDNGQLISAINSVKDTTGVQASKDENGKLVLT      |  |                                  |  |                  |
|      |     |                                                                |  |                                  |  |                  |
| FlaA | 301 | SADGRGIKITGSIGPGAGIL--QTENYGRSLVKNDGRDINIGGTNLSAIGMGAADMISQ    |  |                                  |  |                  |
|      |     |                                                                |  |                                  |  |                  |
| FlaB | 301 | SADGRGIKITGDIGVSGGILSNQKENYGRSLVKNDGRDINISGTNLSTIGMGTTDMISQ    |  |                                  |  |                  |
|      |     |                                                                |  |                                  |  |                  |
| FlaA | 359 | ASVSLRESKQISAANADAMGFNSYNGGGAKQIVIA--SSIGAFMSQAGSGFSKGSQGSVSVG |  |                                  |  |                  |
|      |     |                                                                |  |                                  |  |                  |
| FlaB | 361 | ASVSLRESKQISATNADAMGFNSYKGGKFVFTQAVSSISAFMSASGSGFSKGSQGSVSVG   |  |                                  |  |                  |
|      |     |                                                                |  |                                  |  |                  |
| FlaA | 418 | SGKNYSTVLSGSVQIVSSAASISNTYVVSKGSFSSGSGNSQFAALKTSTVSAHEATAGV    |  |                                  |  |                  |
|      |     |                                                                |  |                                  |  |                  |
| FlaB | 421 | SGKNLSVGLTEGIKIVSSAASMSNTYVVSSGSGFSSGSGNSQFAALKATAANTTDETAGV   |  |                                  |  |                  |
|      |     |                                                                |  |                                  |  |                  |
|      |     | <b>GAMAVMDIAETAITNLQDIR</b>                                    |  |                                  |  | <b>DVDF</b>      |
| FlaA | 478 | TTLKGAMAVMDIAETAITNLQDIRADIGSIQNQVTSTINNITVTQVNVKSAESQIRDVDF   |  |                                  |  |                  |
|      |     |                                                                |  |                                  |  |                  |
| FlaB | 481 | TTLKGAMAVMDIAETAITNLQDIRADIGSVQNQLQVTINNITVTQVNVKAAESTIRDVDF   |  |                                  |  |                  |
|      |     |                                                                |  |                                  |  |                  |
|      |     |                                                                |  | <b>ADIGSVQNQLQVTINNITVTQVNVK</b> |  |                  |
|      |     | <b>GAMAVMDIAETAITNLQDIR</b>                                    |  |                                  |  |                  |
|      |     | <b>ASESANYSK</b>                                               |  |                                  |  |                  |
| FlaA | 538 | ASESANYSKANILAQSGSYAMAQANSSQQNVLRLLQSA*                        |  |                                  |  |                  |
|      |     |                                                                |  |                                  |  |                  |
| FlaB | 541 | ASESANFSKYNILAQSGSYAMSQANAVQQNVLKLQSA*                         |  |                                  |  |                  |
|      |     |                                                                |  |                                  |  |                  |
|      |     | <b>YNILAQSGSYAMSQANAVQQNVLK</b>                                |  |                                  |  |                  |

**Figure A in S1 File.** Results of the LC–MS/MS analysis of trypsin-digested purified FlaA and FlaB flagellins of *C. jejuni*. The amino acid sequence of the FlaA and FlaB flagellins of *C. jejuni* strain KC40 are aligned. The peptides obtained after LC–MS/MS analysis are highlighted in yellow (FlaA-specific peptides) or blue (FlaB-specific peptides).

## References

- Guerry, P. (1997). Non-lipopolysaccharide surface antigens of *Campylobacter* species. *J. Infect. Dis.* 176: 122-124.
- Nuijten, P.J.M., Van Asten, F.J.A.M., Gaastra, W. & Van der Zeijst, B.A.M. (1990). Structural and functional analysis of two *Campylobacter jejuni* flagellin genes. *J. Biol. Chem.* 265: 17798-17804.
- Vanmarsenille, C., Díaz del Olmo, I., Elseviers, J., Ghassabeh, G.H., Moonens, K., Vertommen, D., *et al.* (2017). Nanobodies targeting conserved epitopes on the Major Outer Membrane Protein of *Campylobacter* as potential tools for control of *Campylobacter* colonization. *Vet Res.* 48: 86.
