# Supplementary material for: In planta expression of nanobody-based designer chicken antibodies targeting Campylobacter
Source: PubMed Central journal article supplement (PMC6160005; doi:10.1371/journal.pone.0204222), 2018-09-27
Supplement: pone.0204222.s008.pdf [file pone.0204222.s008.pdf]

S1 Table. Determination of the chimeric antibody concentration in extracts of *A. thaliana* seeds, with the Chicken IgA ELISA Kit (Abcam; Product code ab157691).

| <b>Chimeric antibody</b> | <b>Concentration (<math>\mu\text{g/ml}</math>) <math>\pm</math> SD</b> | <b><math>\mu\text{g/mg seed}</math> <math>\pm</math> SD</b> | <b>% TSP <math>\pm</math> SD</b> |
|--------------------------|------------------------------------------------------------------------|-------------------------------------------------------------|----------------------------------|
| Nb2Flag8-IgA             | 72.12 $\pm$ 5.95                                                       | 7.21 $\pm$ 0.60                                             | 3.61 $\pm$ 0.30                  |
| Nb2Flag24-IgA            | 106.19 $\pm$ 6.27                                                      | 10.62 $\pm$ 0.63                                            | 5.31 $\pm$ 0.32                  |
| Nb2Flag67-IgA            | 47.54 $\pm$ 0.89                                                       | 4.75 $\pm$ 0.09                                             | 2.38 $\pm$ 0.05                  |
